# Supplementary material for: Radiological Methods for the Imaging of Congenital Malformations of C6-T1, the First and Second Sternal Ribs and Development of a Classification System, Demonstrated in Warmblood Horses
Source: MDPI journal article supplement (doi:10.3390/ani13233732), 2023-12-02
Supplement: s1 [file s1]

**Table S1.** Joint distributions of the different grades of C6 and C7 for the right and left side and for contralateral sides.

| <b>Cervical vertebrae</b> |         | <b>C6-grades</b> |         |         |         |         |     |
|---------------------------|---------|------------------|---------|---------|---------|---------|-----|
| <b>C6-right</b>           |         | Grade 0          | Grade 1 | Grade 2 | Grade 3 | Grade 4 | All |
|                           |         | 11               | 0       | 0       | 0       | 28      | 39  |
| <b>C7-right</b>           | Grade 0 | 10               | 0       | 0       | 0       | 1       | 11  |
|                           | Grade 1 | 1                | 0       | 0       | 0       | 1       | 2   |
|                           | Grade 2 | 0                | 0       | 0       | 0       | 12      | 12  |
|                           | Grade 3 | 0                | 0       | 0       | 0       | 14      | 14  |
|                           | All     | 11               | 0       | 0       | 0       | 28      | 39  |
| <b>C6-right</b>           |         |                  |         |         |         |         |     |
| <b>C7-left</b>            | Grade 0 | 2                | 0       | 0       | 0       | 1       | 3   |
|                           | Grade 1 | 0                | 0       | 0       | 0       | 1       | 1   |
|                           | Grade 2 | 4                | 0       | 0       | 0       | 9       | 13  |
|                           | Grade 3 | 5                | 0       | 0       | 0       | 17      | 22  |
|                           | All     | 11               | 0       | 0       | 0       | 28      | 39  |
|                           |         |                  |         |         |         |         |     |
| <b>C6-left</b>            |         | Grade 0          | Grade 1 | Grade 2 | Grade 3 | Grade 4 | All |
|                           |         | 3                | 0       | 1       | 1       | 34      | 39  |
| <b>C7-left</b>            | Grade 0 | 3                | 0       | 0       | 0       | 0       | 3   |
|                           | Grade 1 | 0                | 0       | 0       | 0       | 1       | 1   |
|                           | Grade 2 | 0                | 0       | 1       | 1       | 11      | 13  |
|                           | Grade 3 | 0                | 0       | 0       | 0       | 22      | 22  |
|                           | All     | 3                | 0       | 1       | 1       | 34      | 39  |
| <b>C6-left</b>            |         |                  |         |         |         |         |     |
| <b>C7-right</b>           | Grade 0 | 2                | 0       | 1       | 1       | 7       | 11  |
|                           | Grade 1 | 0                | 0       | 0       | 0       | 2       | 2   |
|                           | Grade 2 | 1                | 0       | 0       | 0       | 11      | 12  |
|                           | Grade 3 | 0                | 0       | 0       | 0       | 14      | 14  |
|                           | All     | 3                | 0       | 1       | 1       | 34      | 39  |

**Table S2.** Joint distributions of normal and malformed C6 and C7 for the right and left side and for contralateral sides. All grades > 0 by side are encoded as 1 and normal vertebrae (grade 0) by side as 0.

| <b>Cervical vertebrae</b> |           | <b>C6</b> |           |     |
|---------------------------|-----------|-----------|-----------|-----|
| <b>C6-right</b>           |           | Normal    | Malformed | All |
|                           |           | 11        | 28        | 39  |
| <b>C7-right</b>           | Normal    | 10        | 1         | 11  |
|                           | Malformed | 1         | 27        | 28  |
|                           | All       | 11        | 28        | 39  |
| <b>C6-right</b>           |           |           |           |     |
| <b>C7-left</b>            | Normal    | 2         | 1         | 3   |
|                           | Malformed | 9         | 27        | 36  |
|                           | All       | 11        | 28        | 39  |
|                           |           |           |           |     |
| <b>C6-left</b>            |           | Normal    | Malformed | All |
|                           |           | 3         | 36        | 39  |
| <b>C7-left</b>            | Normal    | 3         | 0         | 3   |
|                           | Malformed | 0         | 36        | 36  |
|                           | All       | 3         | 36        | 39  |
| <b>C6-left</b>            |           |           |           |     |
| <b>C7-right</b>           | Normal    | 2         | 9         | 11  |
|                           | Malformed | 1         | 27        | 29  |
|                           | All       | 3         | 36        | 39  |

**Table S3.** Joint distributions of the different grades of the length and width of the first ribs for the right and left side and for contralateral sides.

| <b>Length of first rib</b> |                     | <b>Length-grades</b> |         |         |         |         |       |     |
|----------------------------|---------------------|----------------------|---------|---------|---------|---------|-------|-----|
| <b>R1-right</b>            |                     | Grade 0              | Grade 1 | Grade 2 | Grade 3 | Grade 4 | Bifid | All |
|                            |                     | 12                   | 1       | 3       | 15      | 2       | 2     | 35  |
| <b>R1-left</b>             | Grade 0             | 4                    | 0       | 2       | 2       | 0       | 0     | 8   |
|                            | Grade 1             | 2                    | 0       | 0       | 0       | 0       | 0     | 2   |
|                            | Grade 2             | 2                    | 1       | 0       | 2       | 0       | 1     | 6   |
|                            | Grade 3             | 3                    | 0       | 1       | 10      | 0       | 1     | 15  |
|                            | Grade 4             | 0                    | 0       | 0       | 1       | 2       | 0     | 3   |
|                            | Bifid               | 1                    | 0       | 0       | 0       | 0       | 0     | 1   |
| <b>Width of first rib</b>  |                     | <b>Width-grades</b>  |         |         |         |         |       |     |
| <b>R1-right</b>            |                     | Grade 0              | Grade 1 | Grade 2 | Grade 3 | Grade 4 | Bifid | All |
|                            |                     | 10                   | 4       | 1       | 18      | 2       | 2     | 37  |
| <b>R1-left</b>             | Grade 0             | 0                    | 1       | 4       | 0       | 0       | 0     | 5   |
|                            | Grade 1             | 3                    | 0       | 0       | 0       | 0       | 0     | 3   |
|                            | Grade 2             | 1                    | 0       | 1       | 0       | 0       | 0     | 2   |
|                            | Grade 3             | 5                    | 3       | 0       | 13      | 0       | 2     | 23  |
|                            | Grade 4             | 0                    | 0       | 0       | 1       | 2       | 0     | 3   |
|                            | Bifid               | 1                    | 0       | 0       | 0       | 0       | 1     | 1   |
|                            |                     |                      |         |         |         |         |       |     |
| <b>Width of first rib</b>  |                     | <b>Width-grades</b>  |         |         |         |         |       |     |
| <b>R1-right</b>            |                     | Grade 0              | Grade 1 | Grade 2 | Grade 3 | Grade 4 | Bifid | All |
|                            |                     | 10                   | 4       | 0       | 20      | 2       | 2     | 38  |
| <b>Length of R1-right</b>  | Grade 0             | 10                   | 3       | 0       | 0       | 0       | 0     | 13  |
|                            | Grade 1             | 1                    | 0       | 0       | 0       | 0       | 0     | 1   |
|                            | Grade 2             | 0                    | 0       | 0       | 3       | 0       | 0     | 3   |
|                            | Grade 3             | 0                    | 0       | 0       | 17      | 0       | 0     | 17  |
|                            | Grade 4             | 0                    | 0       | 0       | 0       | 2       | 0     | 2   |
|                            | Bifid               | 0                    | 0       | 0       | 0       | 0       | 2     | 2   |
|                            |                     |                      |         |         |         |         |       |     |
| <b>Width of first rib</b>  | <b>Width-grades</b> |                      |         |         |         |         |       |     |
| <b>R1-right</b>            |                     | Grade 0              | Grade 1 | Grade 2 | Grade 3 | Grade 4 | Bifid | All |
|                            |                     | 9                    | 4       | 1       | 18      | 2       | 2     | 36  |
| <b>Length of R1-left</b>   | Grade 0             | 3                    | 1       | 0       | 4       | 0       | 0     | 8   |
|                            | Grade 1             | 2                    | 0       | 0       | 0       | 0       | 0     | 2   |
|                            | Grade 2             | 1                    | 2       | 0       | 2       | 0       | 1     | 6   |
|                            | Grade 3             | 2                    | 1       | 2       | 11      | 0       | 1     | 16  |
|                            | Grade 4             | 0                    | 0       | 0       | 1       | 2       | 0     | 3   |
|                            | Bifid               | 1                    | 0       | 0       | 0       | 0       | 0     | 1   |

|                           |                     |         |         |         |         |         |       |     |
|---------------------------|---------------------|---------|---------|---------|---------|---------|-------|-----|
| <b>Width of first rib</b> | <b>Width-grades</b> |         |         |         |         |         |       |     |
| <b>R1-left</b>            |                     | Grade 0 | Grade 1 | Grade 2 | Grade 3 | Grade 4 | Bifid | All |
|                           |                     | 5       | 3       | 1       | 23      | 3       | 1     | 36  |
| <b>Length of R1-right</b> | Grade 0             | 1       | 3       | 1       | 7       | 0       | 1     | 13  |
|                           | Grade 1             | 0       | 0       | 0       | 1       | 0       | 0     | 1   |
|                           | Grade 2             | 2       | 0       | 0       | 1       | 0       | 0     | 3   |
|                           | Grade 3             | 2       | 0       | 0       | 12      | 1       | 0     | 15  |
|                           | Grade 4             | 0       | 0       | 0       | 0       | 2       | 0     | 2   |
|                           | Bifid               | 0       | 0       | 0       | 2       | 0       | 0     | 2   |
|                           |                     |         |         |         |         |         |       |     |
| <b>Width of first rib</b> | <b>Width-grades</b> |         |         |         |         |         |       |     |
| <b>R1-left</b>            |                     | Grade 0 | Grade 1 | Grade 2 | Grade 3 | Grade 4 | Bifid | All |
|                           |                     | 5       | 3       | 2       | 22      | 3       | 1     | 36  |
| <b>Length of R1-left</b>  | Grade 0             | 5       | 2       | 1       | 0       | 0       | 0     | 8   |
|                           | Grade 1             | 0       | 1       | 0       | 1       | 0       | 0     | 2   |
|                           | Grade 2             | 0       | 0       | 0       | 6       | 0       | 0     | 6   |
|                           | Grade 3             | 0       | 0       | 1       | 15      | 0       | 0     | 16  |
|                           | Grade 4             | 0       | 0       | 0       | 0       | 3       | 0     | 3   |
|                           | Bifid               | 0       | 0       | 0       | 0       | 0       | 1     | 1   |

**Table S4.** Joint distributions of normal and malformed first ribs for the right and left side and for contralateral sides. All grades > 0 by side are encoded as 1 and normal ribs (grade 0) by side as 0.

|                           |           |               |           |     |
|---------------------------|-----------|---------------|-----------|-----|
| <b>First ribs</b>         |           | <b>Length</b> |           |     |
| <b>Length of R1-right</b> |           | Normal        | Malformed | All |
|                           |           | 12            | 23        | 35  |
| <b>Length of R1-left</b>  | Normal    | 4             | 4         | 8   |
|                           | Malformed | 8             | 19        | 27  |
|                           |           |               |           |     |
|                           |           | <b>Width</b>  |           |     |
| <b>Width of R1-right</b>  |           | Normal        | Malformed | All |
|                           |           | 10            | 27        | 37  |
| <b>Width of R1-left</b>   | Normal    | 0             | 5         | 5   |
|                           | Malformed | 10            | 22        | 32  |
|                           |           |               |           |     |
|                           |           | <b>Width</b>  |           |     |
| <b>Width of R1-right</b>  |           | Normal        | Malformed | All |
|                           |           | 10            | 28        | 38  |
| <b>Length of R1-right</b> | Normal    | 10            | 3         | 13  |
|                           | Malformed | 0             | 25        | 25  |
|                           |           |               |           |     |
|                           |           | <b>Width</b>  |           |     |
| <b>Width of R1-right</b>  |           | Normal        | Malformed | All |
|                           |           | 9             | 27        | 36  |
| <b>Length of R1-left</b>  | Normal    | 3             | 5         | 8   |
|                           | Malformed | 6             | 22        | 28  |
|                           |           |               |           |     |
|                           |           | <b>Width</b>  |           |     |
| <b>Width of R1-left</b>   |           | Normal        | Malformed | All |
|                           |           | 5             | 31        | 36  |
| <b>Length of R1-right</b> | Normal    | 1             | 12        | 13  |
|                           | Malformed | 4             | 19        | 23  |
|                           |           |               |           |     |
|                           |           | <b>Width</b>  |           |     |
| <b>Width of R1-left</b>   |           | Normal        | Malformed | All |
|                           |           | 5             | 31        | 36  |
| <b>Length of R1-left</b>  | Normal    | 5             | 3         | 8   |
|                           | Malformed | 0             | 28        | 28  |

**Table S5.** Joint distributions of the different grades of the width of the second ribs for the right and left side.

| <b>Width of second rib</b> | <b>Width-grades</b> |         |         |         |         |         |       |     |
|----------------------------|---------------------|---------|---------|---------|---------|---------|-------|-----|
| <b>R2-right</b>            |                     | Grade 0 | Grade 1 | Grade 2 | Grade 3 | Grade 4 | Bifid | All |
|                            |                     | 12      | 15      | 2       | 0       | 0       | 2     | 31  |
| <b>Width of R2-left</b>    | Grade 0             | 4       | 3       | 0       | 0       | 0       | 0     | 7   |
|                            | Grade 1             | 7       | 10      | 0       | 0       | 0       | 2     | 19  |
|                            | Grade 2             | 0       | 2       | 2       | 0       | 0       | 0     | 4   |
|                            | Grade 3             | 0       | 0       | 0       | 0       | 0       | 0     | 0   |
|                            | Grade 4             | 0       | 0       | 0       | 0       | 0       | 0     | 0   |
|                            | Bifid               | 1       | 0       | 0       | 0       | 0       | 0     | 1   |

**Table S6.** Joint distributions of the different grades of the length of the first ribs for the right and left side with the width of the second ribs.

| Length of first rib |         | Length-grades |         |         |         |         |       |     |
|---------------------|---------|---------------|---------|---------|---------|---------|-------|-----|
| R1-right            |         | Grade 0       | Grade 1 | Grade 2 | Grade 3 | Grade 4 | Bifid | All |
|                     |         | 10            | 1       | 3       | 16      | 1       | 2     | 33  |
| Width of R2-right   | Grade 0 | 10            | 0       | 0       | 2       | 0       | 0     | 12  |
|                     | Grade 1 | 0             | 1       | 2       | 13      | 1       | 0     | 17  |
|                     | Grade 2 | 0             | 0       | 1       | 1       | 0       | 0     | 2   |
|                     | Grade 3 | 0             | 0       | 0       | 0       | 0       | 0     | 0   |
|                     | Grade 4 | 0             | 0       | 0       | 0       | 0       | 0     | 0   |
|                     | Bifid   | 0             | 0       | 0       | 0       | 0       | 2     | 2   |
| Length of first rib |         | Length-grades |         |         |         |         |       |     |
| R1-right            |         | Grade 0       | Grade 1 | Grade 2 | Grade 3 | Grade 4 | Bifid | All |
|                     |         | 10            | 1       | 3       | 14      | 0       | 2     | 30  |
| Width of R2-left    | Grade 0 | 2             | 0       | 2       | 3       | 0       | 0     | 7   |
|                     | Grade 1 | 7             | 0       | 0       | 9       | 0       | 2     | 18  |
|                     | Grade 2 | 0             | 1       | 1       | 2       | 0       | 0     | 4   |
|                     | Grade 3 | 0             | 0       | 0       | 0       | 0       | 0     | 0   |
|                     | Grade 4 | 0             | 0       | 0       | 0       | 0       | 0     | 0   |
|                     | Bifid   | 1             | 0       | 0       | 0       | 0       | 0     | 1   |
| Length of first rib |         | Length-grades |         |         |         |         |       |     |
| R1-left             |         | Grade 0       | Grade 1 | Grade 2 | Grade 3 | Grade 4 | Bifid | All |
|                     |         | 6             | 2       | 6       | 15      | 2       | 1     | 32  |
| Width of R2-right   | Grade 0 | 3             | 2       | 2       | 4       | 0       | 1     | 12  |
|                     | Grade 1 | 3             | 0       | 3       | 8       | 2       | 0     | 16  |
|                     | Grade 2 | 0             | 0       | 0       | 2       | 0       | 0     | 2   |
|                     | Grade 3 | 0             | 0       | 0       | 0       | 0       | 0     | 0   |
|                     | Grade 4 | 0             | 0       | 0       | 0       | 0       | 0     | 0   |
|                     | Bifid   | 0             | 0       | 1       | 1       | 0       | 0     | 2   |
| Length of first rib |         | Length-grades |         |         |         |         |       |     |
| R1-left             |         | Grade 0       | Grade 1 | Grade 2 | Grade 3 | Grade 4 | Bifid | All |
|                     |         | 6             | 2       | 6       | 15      | 1       | 1     | 31  |
| Width of R2-left    | Grade 0 | 4             | 1       | 0       | 2       | 0       | 0     | 7   |
|                     | Grade 1 | 2             | 1       | 5       | 10      | 1       | 0     | 19  |
|                     | Grade 2 | 0             | 0       | 1       | 3       | 0       | 0     | 4   |
|                     | Grade 3 | 0             | 0       | 0       | 0       | 0       | 0     | 0   |
|                     | Grade 4 | 0             | 0       | 0       | 0       | 0       | 0     | 0   |
|                     | Bifid   | 0             | 0       | 0       | 0       | 0       | 1     | 1   |

**Table S7.** Joint distributions of the different grades of the width of the first ribs for the right and left side with the width of the second ribs.

| Width of first rib        |                     | Width-grades        |         |         |         |         |       |     |
|---------------------------|---------------------|---------------------|---------|---------|---------|---------|-------|-----|
| <b>R1-right</b>           |                     | Grade 0             | Grade 1 | Grade 2 | Grade 3 | Grade 4 | Bifid | All |
|                           |                     | 8                   | 3       | 1       | 19      | 1       | 2     | 34  |
| <b>Width of R2-right</b>  | Grade 0             | 8                   | 2       | 0       | 2       | 0       | 0     | 12  |
|                           | Grade 1             | 0                   | 1       | 1       | 15      | 1       | 0     | 18  |
|                           | Grade 2             | 0                   | 0       | 0       | 2       | 0       | 0     | 2   |
|                           | Grade 3             | 0                   | 0       | 0       | 0       | 0       | 0     | 0   |
|                           | Grade 4             | 0                   | 0       | 0       | 0       | 0       | 0     | 0   |
|                           | Bifid               | 0                   | 0       | 0       | 0       | 0       | 2     | 2   |
|                           |                     |                     |         |         |         |         |       |     |
| <b>Width of first rib</b> |                     | <b>Width-grades</b> |         |         |         |         |       |     |
| <b>R1-right</b>           |                     | Grade 0             | Grade 1 | Grade 2 | Grade 3 | Grade 4 | Bifid | All |
|                           |                     | 8                   | 3       | 1       | 17      | 0       | 2     | 31  |
| <b>Width of R2-left</b>   | Grade 0             | 2                   | 0       | 0       | 5       | 0       | 0     | 7   |
|                           | Grade 1             | 5                   | 2       | 1       | 9       | 0       | 2     | 19  |
|                           | Grade 2             | 0                   | 1       | 0       | 3       | 0       | 0     | 4   |
|                           | Grade 3             | 0                   | 0       | 0       | 0       | 0       | 0     | 0   |
|                           | Grade 4             | 0                   | 0       | 0       | 0       | 0       | 0     | 0   |
|                           | Bifid               | 1                   | 0       | 0       | 0       | 0       | 0     | 1   |
|                           |                     |                     |         |         |         |         |       |     |
| <b>Width of first rib</b> | <b>Width-grades</b> |                     |         |         |         |         |       |     |
| <b>R1-left</b>            |                     | Grade 0             | Grade 1 | Grade 2 | Grade 3 | Grade 4 | Bifid | All |
|                           |                     | 3                   | 3       | 2       | 21      | 2       | 1     | 32  |
| <b>Width of R2-right</b>  | Grade 0             | 0                   | 3       | 1       | 7       | 0       | 1     | 12  |
|                           | Grade 1             | 3                   | 0       | 1       | 10      | 2       | 0     | 16  |
|                           | Grade 2             | 0                   | 0       | 0       | 2       | 0       | 0     | 2   |
|                           | Grade 3             | 0                   | 0       | 0       | 0       | 0       | 0     | 0   |
|                           | Grade 4             | 0                   | 0       | 0       | 0       | 0       | 0     | 0   |
|                           | Bifid               | 0                   | 0       | 0       | 2       | 0       | 0     | 2   |
|                           |                     |                     |         |         |         |         |       |     |
| <b>Width of first rib</b> | <b>Width-grades</b> |                     |         |         |         |         |       |     |
| <b>R1-left</b>            |                     | Grade 0             | Grade 1 | Grade 2 | Grade 3 | Grade 4 | Bifid | All |
|                           |                     | 3                   | 3       | 2       | 21      | 1       | 1     | 31  |
| <b>Width of R2-left</b>   | Grade 0             | 3                   | 1       | 0       | 3       | 0       | 0     | 7   |
|                           | Grade 1             | 0                   | 2       | 2       | 14      | 1       | 0     | 19  |
|                           | Grade 2             | 0                   | 0       | 0       | 4       | 0       | 0     | 4   |



|  |         |   |   |   |   |   |   |   |
|--|---------|---|---|---|---|---|---|---|
|  | Grade 3 | 0 | 0 | 0 | 0 | 0 | 0 | 0 |
|  | Grade 4 | 0 | 0 | 0 | 0 | 0 | 0 | 0 |
|  | Bifid   | 0 | 0 | 0 | 0 | 0 | 1 | 1 |
